# Supplementary material for: DNA metabarcoding unveils multiscale trophic variation in a widespread coastal opportunist
Source: PubMed Central journal article supplement (PMC7380037; doi:10.1111/mec.14886), 2018-10-24
Supplement: MEC-28-232-s001.pdf [file MEC-28-232-s001.pdf]

## Supplemental Information for:

### DNA metabarcoding unveils multi-scale trophic variation in a widespread coastal opportunist

Andjin Siegenthaler, Owen S. Wangensteen, Chiara Benvenuto, Joana Campos & Stefano Mariani

#### Table of Contents:

|                  |        |
|------------------|--------|
| <b>Table S1</b>  | Page 2 |
| <b>Table S2</b>  | Page 3 |
| <b>Table S3</b>  | Page 4 |
| <b>Table S4</b>  | Page 5 |
| <b>Figure S1</b> | Page 6 |
| <b>Table S5</b>  | Page 7 |
| <b>Table S6</b>  | Page 8 |
| <b>Table S7</b>  | Page 9 |

Table S1. Number of pooled full *Crangon crangon* stomachs per sample. Only samples with less than 8 pooled stomachs are shown. \* Samples not used for molecular analysis (< 1000 diet-related reads)

| <b>Estuary</b>  | <b>Sample</b> | <b>N stomachs</b> |
|-----------------|---------------|-------------------|
| Aveiro          | Av_1C         | 4                 |
| Aveiro          | Av_2B         | 7                 |
| Eastern Scheldt | ES_2A         | 5                 |
| Eastern Scheldt | ES_2B*        | 4                 |
| Eastern Scheldt | ES_3C         | 5                 |
| Kent            | Ke_1C*        | 5                 |
| Kent            | Ke_4C         | 7                 |
| Mersey          | Me_1C         | 4                 |
| Mersey          | Me_2A*        | 6                 |
| Mersey          | Me_3B*        | 7                 |
| Western Scheldt | WS_2C         | 4                 |
| Western Scheldt | WS_4C         | 4                 |

Table S2. Mean ( $\pm$ SD) total length of *Crangon crangon* (>20 mm TL) sampled and dissected for stomach DNA extraction per site. \* Site not used for molecular analysis

| Estuary         | Site  | Sampled   |    | DNA extracted |    |
|-----------------|-------|-----------|----|---------------|----|
|                 |       | Mean (mm) | SD | Mean (mm)     | SD |
| Aveiro          | Av_1  | 32        | 5  | 32            | 6  |
| Aveiro          | Av_2  | 30        | 4  | 30            | 3  |
| Aveiro          | Av_3  | 31        | 4  | 31            | 5  |
| Eastern Scheldt | ES_1  | 25        | 6  | 27            | 6  |
| Eastern Scheldt | ES_2  | 33        | 7  | 32            | 6  |
| Eastern Scheldt | ES_3  | 30        | 6  | 32            | 6  |
| Eastern Scheldt | ES_4  | 34        | 7  | 34            | 8  |
| Kent            | Ke_1  | 32        | 3  | 31            | 3  |
| Kent            | Ke_2  | 32        | 3  | 32            | 4  |
| Kent            | Ke_3  | 31        | 3  | 32            | 3  |
| Kent            | Ke_4  | 29        | 2  | 29            | 2  |
| Mersey          | Me_1  | 47        | 4  | 48            | 3  |
| Mersey          | Me_2  | 40        | 7  | 42            | 7  |
| Mersey          | Me_3* | 40        | 7  |               |    |
| Mersey          | Me_4  | 39        | 7  | 36            | 5  |
| Mersey          | Me_5  | 41        | 7  | 40            | 6  |
| Mersey          | Me_6  | 42        | 7  | 40            | 4  |
| Minho           | Mi_1  | 41        | 4  | 39            | 3  |
| Minho           | Mi_2  | 39        | 5  | 38            | 4  |
| Minho           | Mi_3  | 35        | 5  | 36            | 3  |
| Western Scheldt | WS_1  | 32        | 5  | 32            | 4  |
| Western Scheldt | WS_2  | 26        | 4  | 27            | 4  |
| Western Scheldt | WS_3  | 36        | 6  | 37            | 6  |
| Western Scheldt | WS_4  | 44        | 6  | 43            | 7  |

Table S3. *Purpureocillium lilacinum* sequences detected in *Crangon crangon* stomach samples

| Marker | Sequence                                                                                                                                                                                                                                                                                                                                                                                                                                                                                       | Match                                                              | Query cover | E-Value            | Identity |
|--------|------------------------------------------------------------------------------------------------------------------------------------------------------------------------------------------------------------------------------------------------------------------------------------------------------------------------------------------------------------------------------------------------------------------------------------------------------------------------------------------------|--------------------------------------------------------------------|-------------|--------------------|----------|
| COI    | TTTATCAGGATTACAAAGTCACAGTGGACCTA<br>GTGTAGATTTAGCAATTTTTGCTTTACACCTTT<br>CAGGGGTAAGTAGTTTATTAGGAGCAATAAA<br>CTTCATAACTACAATCGCTAATATGAGAACAC<br>CAGGAATAAGATTACACAAATTAGCCTTATTC<br>GGGTGAGCTGTAGTTATAACAGCTATCTTATT<br>ATTATTATCATTACCTGTTTTAGCTGGAGGTAT<br>TACAATGGTATTAACAGATAGAAATTTTAACA<br>CTTCATTCTTCGAAGTAGCTGGTGGTGGAGAT<br>CCTATATTATTCCAACACTTATTC                                                                                                                                  | <i>Purpureocillium<br/>lilacinum</i>                               | 100%        | 2e <sup>-156</sup> | 99%      |
| ITS    | ACTCCCAAACCCACTGTGAACCTTACCTCAGTT<br>GCCTCGGCGGGAACGCCCCGCGCCGCGGCC<br>CCGCGCCGCGCGCCGACCCAGGCGCCCGCCG<br>CAGGGACCCCAAACCTCTCTTGCAATACGCCCA<br>GCGGGCGGAATTTCTCTCTGAGTTGCACAAG<br>CAAAAACAAATGAATCAAACTTTCAACAACG<br>GATCTCTTGGTTCTGGCATCGATGAAGAACGC<br>AGCGAAATGCGATAAGTAATGTGAATTGCAG<br>AATTCAGTGAATCATCGAATCTTTGAACGCAC<br>ATTGCGCCCGCCAGCATTCTGGCGGGCATGCC<br>TGTTGAGCGTCATTTCAACCCTCGAGCCCCC<br>CGGGGGCCTCGGTGTTGGGGGACGGCACACC<br>AGCCGCCCCGAAATGCAGTGCGGACCCCGC<br>CGCAGCCTCCCCTGCGTA | <i>Purpureocillium<br/>lilacinum</i> isolate<br>NIOSN_SK56_S7<br>6 | 100%        | 0.0                | 100%     |

---

Table S4. List of pooled stomach samples removed prior to analysis due to low read depth (< 1000 reads) after removal of predator, parasite and contaminant reads. \* Removal of sediment sample due to lack of site Me\_3 stomach samples included in the final analysis.

| <b>Estuary</b>  | <b>Sample</b>         | <b>Number of reads</b> |
|-----------------|-----------------------|------------------------|
| Western Scheldt | WS_1B                 | 330                    |
|                 | WS_3B                 | 486                    |
|                 | WS_4A                 | 420                    |
| Eastern Scheldt | ES_1A                 | 396                    |
|                 | ES_2B                 | 897                    |
|                 | ES_3A                 | 214                    |
|                 | ES_4A                 | 538                    |
|                 | ES_4C                 | 366                    |
| Mersey          | Me_2A                 | 364                    |
|                 | Me_3A                 | 179                    |
|                 | Me_3B                 | 486                    |
|                 | Sediment sample Me_3* | 27212                  |
| Kent            | Ke_1C                 | 669                    |
|                 | Ke_2A                 | 189                    |
|                 | Ke_4A                 | 301                    |

Figure S1. Rarefaction curves of the number of MOTUs obtained at increasing numbers of reads in the sediment (A) and stomach (B) samples per site. *Crangon crangon* and *Purpureocillium lilacinum* have been removed from the stomach samples prior to analysis.

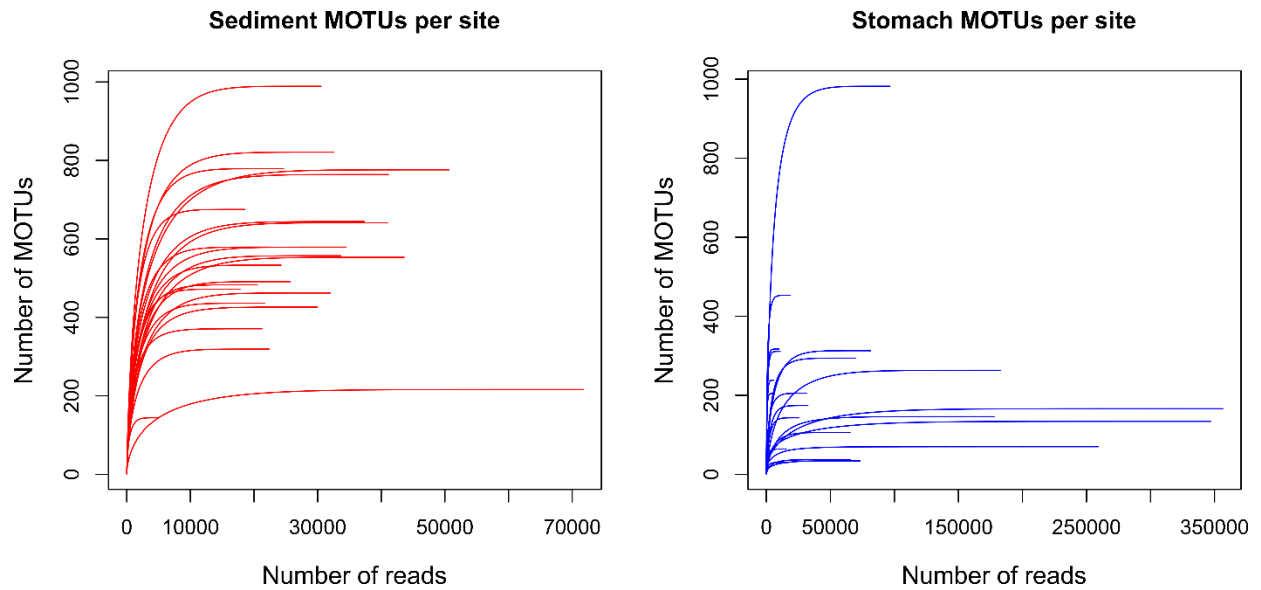

# MOLECULAR ECOLOGY

Table S5. Differences in relative mean read abundance of detected phyla in sediment and *Crangon crangon* full stomach samples. Samples are averaged per site (N = 23) and tested with a paired Wilcoxon signed-rank test. \*\*: P < 0.01

| Phylum          | Mean relative abundance (%) |              | Wilcoxon signed-rank test |       |    |
|-----------------|-----------------------------|--------------|---------------------------|-------|----|
|                 | Sediment                    | Full Stomach | W                         | P     |    |
| Annelida        | 3.43                        | 16.12        | 225                       | 0.007 | ** |
| Arthropoda      | 5.30                        | 48.56        | 274                       | 0.000 | ** |
| Bacillariophyta | 20.47                       | 1.69         | 0                         | 0.000 | ** |
| Chordata        | 0.08                        | 4.81         | 208                       | 0.000 | ** |
| Cnidaria        | 0.79                        | 1.08         | 100                       | 0.259 |    |
| Dinoflagellata  | 6.13                        | 1.55         | 53                        | 0.008 | ** |
| Discosea        | 10.40                       | 0.20         | 0                         | 0.000 | ** |
| Mollusca        | 0.16                        | 1.18         | 192                       | 0.001 | ** |
| Oomycota        | 2.87                        | 0.31         | 3                         | 0.000 | ** |
| Rhodophyta      | 2.00                        | 1.71         | 111                       | 0.427 |    |
| Unassigned      | 44.01                       | 18.92        | 9                         | 0.000 | ** |

Table S6. Pairwise comparisons (Bonferroni-corrected) of square-root transformed Bray-Curtis dissimilarities of *Crangon crangon* pooled stomach contents between estuaries. \* = P < 0.05; \*\* = P < 0.01.

| Pairs                      | F.Model | Df   | R <sup>2</sup> | P        |
|----------------------------|---------|------|----------------|----------|
| Eastern Scheldt vs WScheld | 1.684   | 1,12 | 0.123          | 1.000    |
| Eastern Scheldt vs Minho   | 3.648   | 1,13 | 0.219          | 0.046 *  |
| Eastern Scheldt vs Aveiro  | 2.948   | 1,12 | 0.197          | 0.460    |
| Eastern Scheldt vs Mersey  | 2.782   | 1,17 | 0.141          | 0.105    |
| Eastern Scheldt vs Kent    | 9.698   | 1,12 | 0.447          | 0.010 *  |
| Western Scheldt vs Minho   | 2.368   | 1,15 | 0.136          | 0.426    |
| Western Scheldt vs Aveiro  | 1.872   | 1,14 | 0.118          | 0.784    |
| Western Scheldt vs Mersey  | 1.535   | 1,19 | 0.075          | 1.000    |
| Western Scheldt vs Kent    | 7.116   | 1,14 | 0.337          | 0.015 *  |
| Minho vs Aveiro            | 4.914   | 1,15 | 0.247          | 0.015 *  |
| Minho vs Mersey            | 3.021   | 1,20 | 0.131          | 0.015 *  |
| Minho vs Kent              | 9.597   | 1,15 | 0.390          | 0.001 ** |
| Aveiro vs Mersey           | 4.152   | 1,19 | 0.179          | 0.007 ** |
| Aveiro vs Kent             | 13.336  | 1,14 | 0.488          | 0.004 ** |
| Mersey vs Kent             | 4.224   | 1,19 | 0.182          | 0.030 *  |



Table S7. Mean ( $\pm$  SD) Salinity, median grainsize and total organic matter (TOM) per estuary

| <b>Estuary</b>  | <b>Salinity</b>    | <b>Grain Size (<math>\mu\text{m}</math>)</b> | <b>TOM (%)</b>     |
|-----------------|--------------------|----------------------------------------------|--------------------|
| Aveiro          | 25.5 ( $\pm$ 8.5)  | 271 ( $\pm$ 151)                             | 1.32 ( $\pm$ 0.96) |
| Eastern Scheldt | 31 ( $\pm$ 0.2)    | 294 ( $\pm$ 85)                              | 0.28 ( $\pm$ 0.11) |
| Kent            | 0.3 ( $\pm$ 0.1)   | 76 ( $\pm$ 6)                                | 0.92 ( $\pm$ 0.35) |
| Mersey          | 17.6 ( $\pm$ 10.2) | 132 ( $\pm$ 90)                              | 2.6 ( $\pm$ 3.47)  |
| Minho           | 6.5 ( $\pm$ 3.5)   | 477 ( $\pm$ 181)                             | 0.99 ( $\pm$ 1.15) |
| Western Scheldt | 23.2 ( $\pm$ 5.6)  | 259 ( $\pm$ 101)                             | 0.81 ( $\pm$ 0.57) |
